# Supplementary material for: Pigment Loss and Pseudo-Albinism in Birdshot Chorioretinitis
Source: Research Square preprint supplement (doi:10.21203/rs.3.rs-7482264/v1), 2025-09-24
Supplement: Supplementary file 1 [file b8180513ff49f6f663fecaf9.docx]

|  |  | Estimate | SE | p-value |
| --- | --- | --- | --- | --- |
| BCVA (LogMAR) | **Kruijt Group 3** | 0.16 | 0.18 | 0.38 |
| **Time from First Symptoms to**  **Evaluation (Years)** | 0.01 | 0.03 | 0.66 |
| **History of MO** | 0.04 | 0.08 | 0.63 |
| **History of ODO** | 0.21 | 0.10 | **0.028** |
| **History of CNV** | 0.98 | 0.34 | **0.004** |
| MD (dB) | **Kruijt Group 3** | -0.73 | 1.78 | 0.68 |
| **Time from First Symptoms to**  **Evaluation (Years)** | -0.80 | 0.45 | 0.077 |
| **History of MO** | -1.42 | 1.12 | 0.20 |
| **History of CNV** | -3.35 | 2.08 | 0.11 |
| PSD (dB) | **Kruijt Group 3** | 0.42 | 0.45 | 0.35 |
| **Time from First Symptoms to**  **Evaluation (Years)** | 0.39 | 0.17 | **0.027** |
| **History of ME** | 0.64 | 0.48 | 0.19 |

**Supplementary Table 1. Multivariate GEE** **analysis of factors associated with functional outcomes (BCVA, MD, PSD)** **among the 26 included patients.**

Estimates are regression coefficients from exchangeable‑correlation Generalized Estimating Equations (GEE) models, with standard error (SE) and p‑value for each predictor. Time from First Symptoms isscaled per 5‑year increase. Kruijt group compares patients with Kruijt score 3 vs <3.

A**bbreviations:** BCVA: Best Corrected Visual Acuity (LogMAR), MD: Mean Deviation (dB), PSD: Pattern Standard Deviation (dB), SE: Standard Error, **MO**: Macular Oedema, ODO: Optic Disc Oedema, CNV: Choroidal Neovascularization.
